# Supplementary material
Source: PubMed Central journal article supplement (PMC4399095)
Supplement: ajtr0007-0319-f6.pdf [file ajtr0007-0319-f6.pdf]

## BikDD and proteasome inhibitor combination therapy

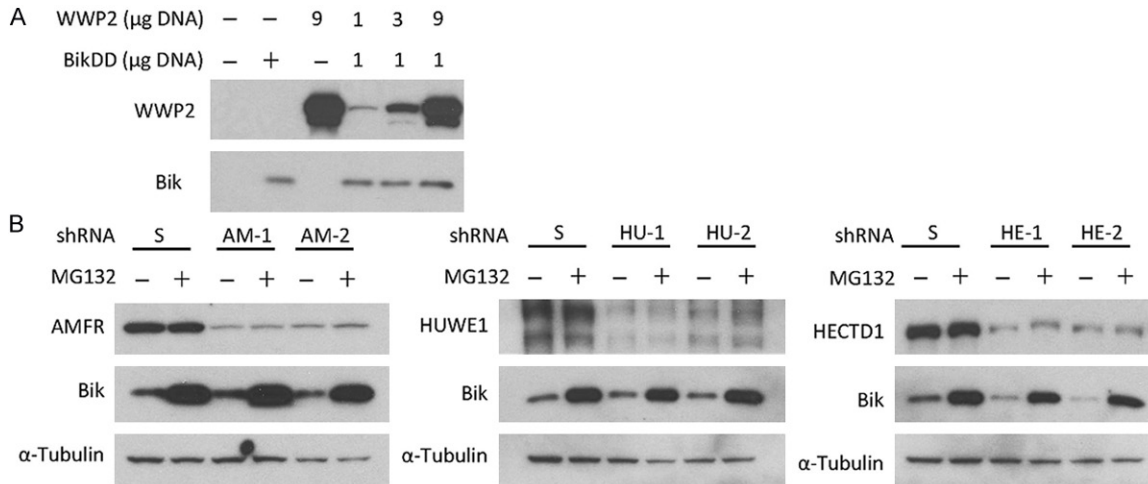

**Supplementary Figure S1.** Identification of potential BikDD E3 ligase. A. Co-transfection of WWP2- and BikDD-expressing plasmid in HEK 293T cells. Cell lysates were subjected to Western blot analysis with the indicated antibodies. B. BikDD-expressing MDA-MB-231 cells were infected with lentivirus expressing shRNAs targeting AMFR (AM-1 and AM-2), HUWE1 (HU-1 and HU-2), or HECTD1 (HE-1 and HE-2). Cells were then treated with DMSO or MG132 (10 μM) for 8 hours. Cell lysates were then subjected to Western blot analysis to detect BikDD levels.
